# Supplementary material for: Matching scales of eddy covariance measurements and process-based modeling – Assessing spatiotemporal dynamics of carbon and water fluxes in a mixed forest in Southern Germany
Source: Copernicus journal article supplement (doi:10.5194/egusphere-2025-4605), 2025-10-06
Supplement: Supplementary file 1 [file egusphere-2025-4605-supplement.pdf]

## Supplementary materials

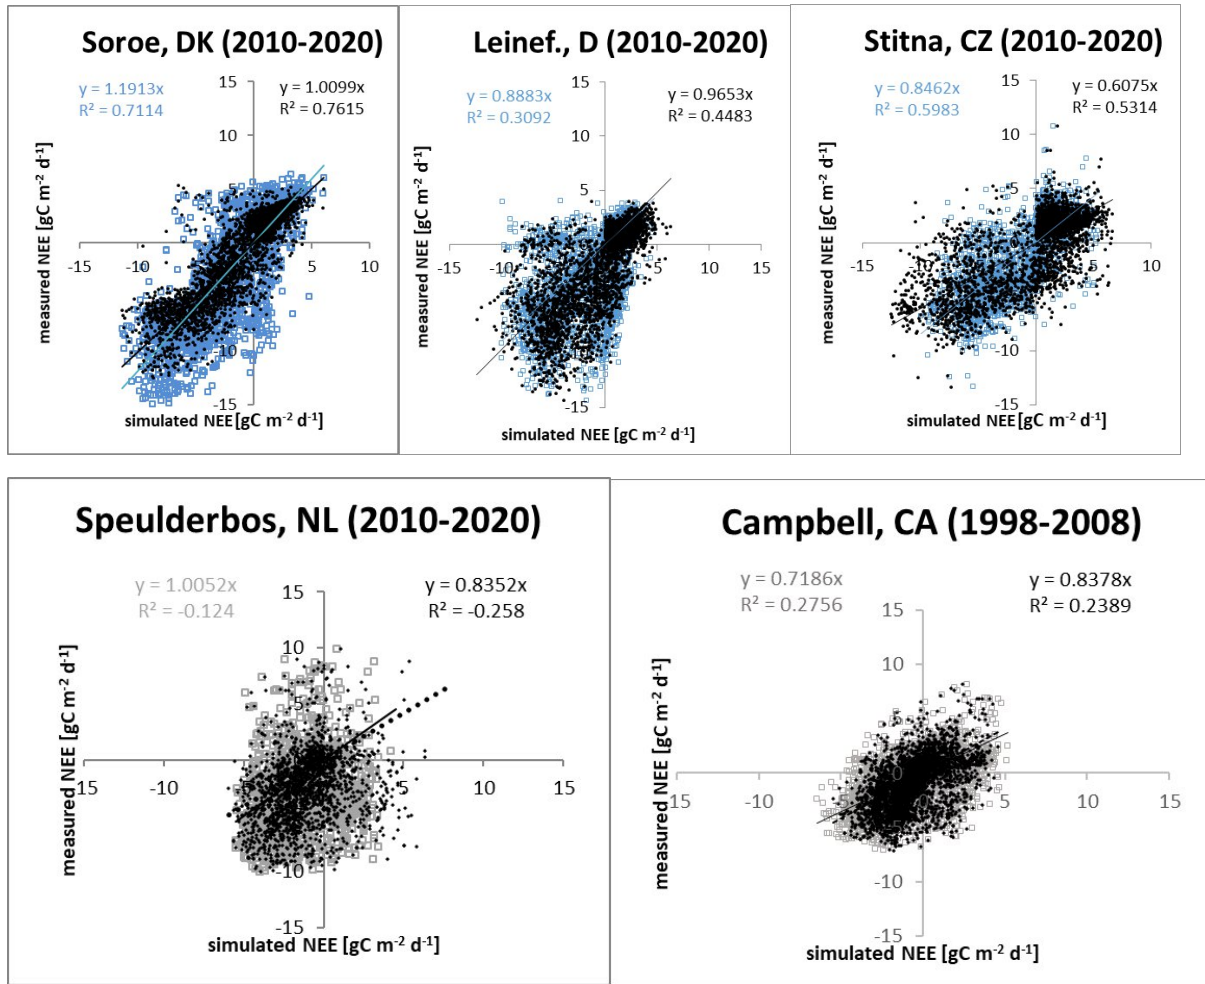

Fig. S1: Measured and simulated net carbon exchange of the ecosystem (NEE) at three beech and 2 Douglas fir ICOS sites. Black points: simulation with standard parameters, Black points: standard parameters, Blue/gray points site parameters, Blue rectangles: Beech, Gray rectangles: Douglas fir.

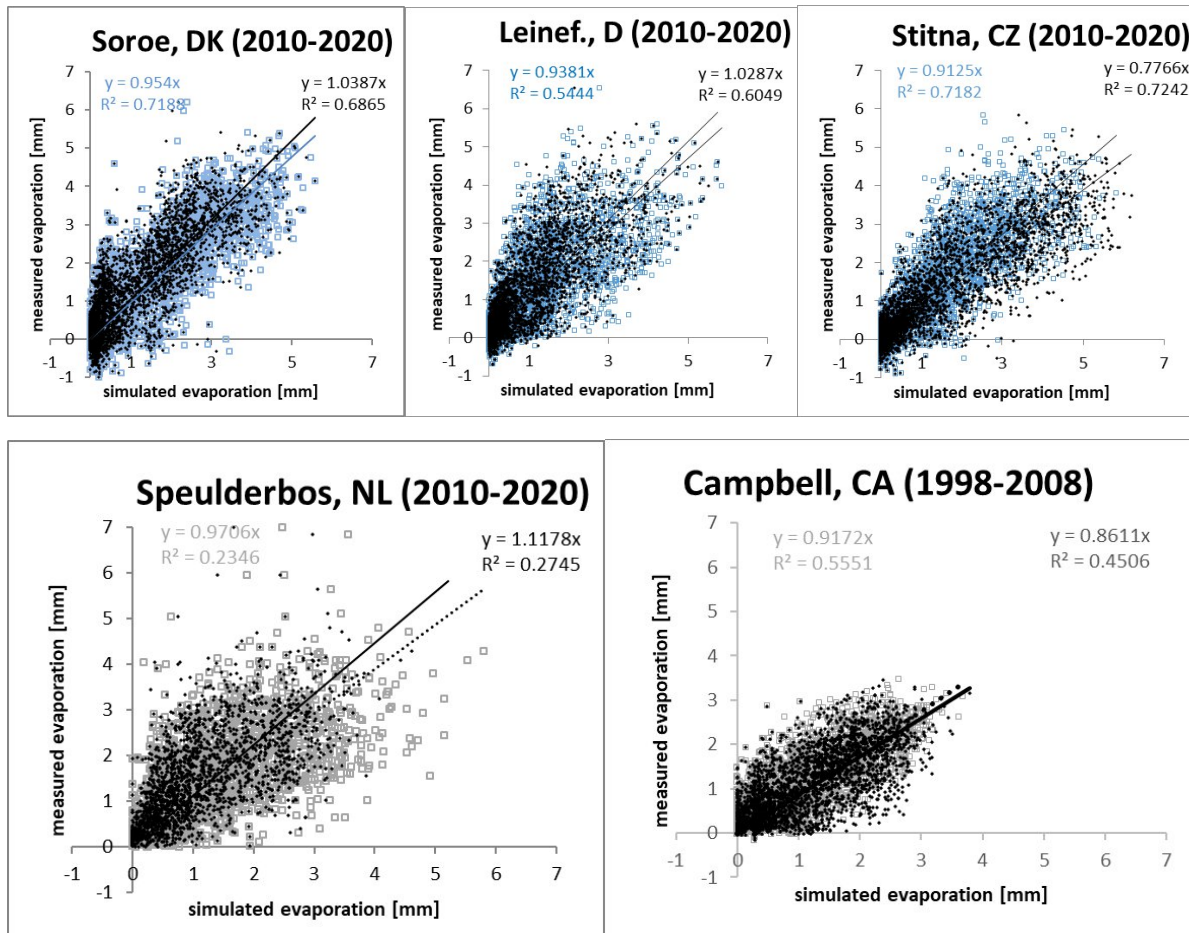

Fig. S2: Measured and simulated evaporation at three beech and 2 Douglas fir ICOS sites. Black points: simulation with standard parameters, Blue/gray points site parameters, Blue rectangles: Beech, Gray rectangles: Douglas fir.

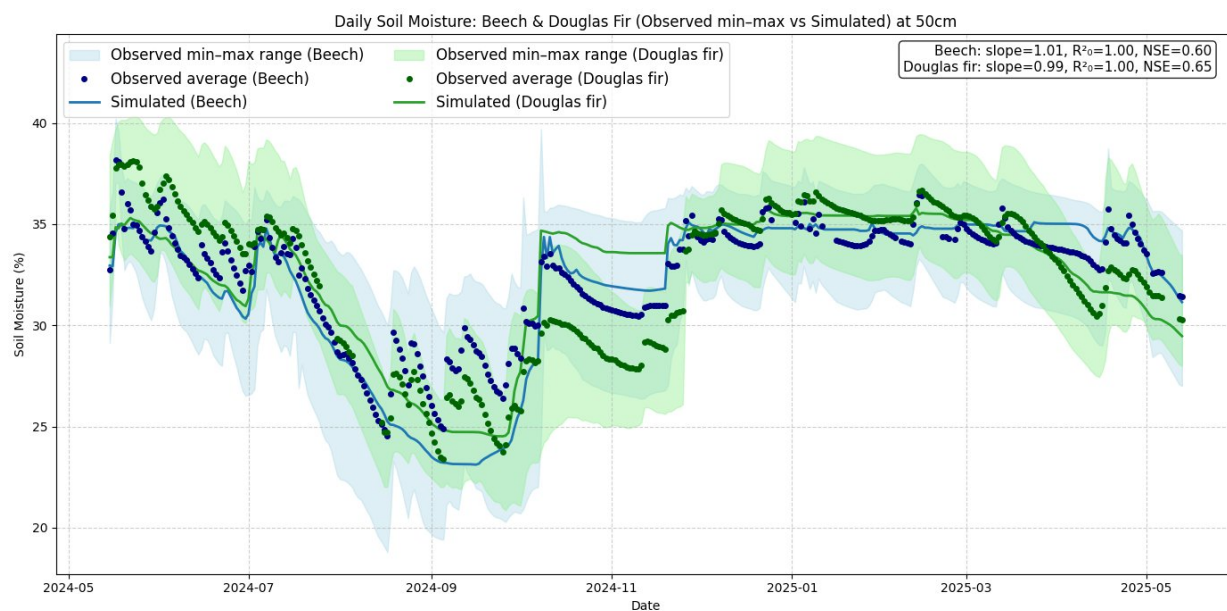

Fig. S3: Comparison of measured and simulated soil moisture at 50 cm depths in pure beech and pure Douglas fir plots from May 2024 to May 2025 at the ECOSENSE forest. Soil moisture was measured at five replicate points per depth in each plot. Simulated values are outputs of LandscapeDNDC model.

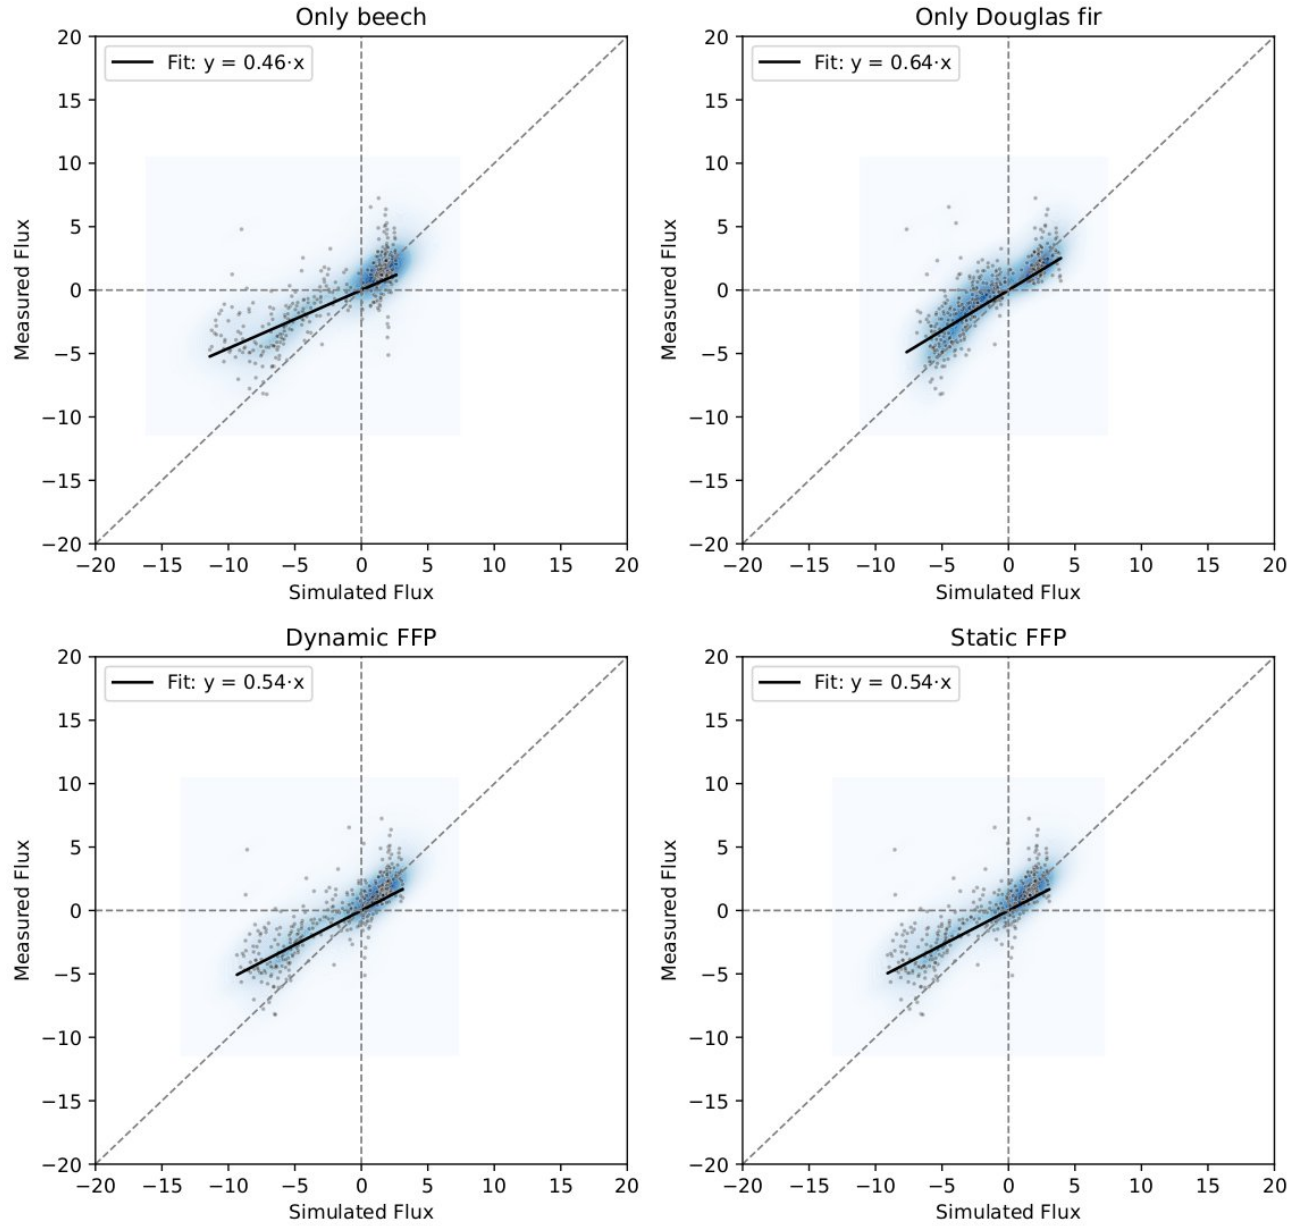

Fig. S4: Comparison between hourly measured and simulated net ecosystem exchange (NEE,  $\text{kgC ha}^{-1}\text{hr}^{-1}$ ) during the flushing phase (April: early flushing phase) at the ECOSENSE forest. (a) Simulated NEE for a pure beech stand compared to measured eddy covariance (EC) NEE. (b) Simulated NEE for a pure Douglas fir stand compared to measured EC NEE. (c) Weighted NEE based on a dynamic footprint composition, with hourly contributions from each species estimated using footprint–land cover overlay. (d) Weighted NEE based on a static footprint composition (66.5% beech, 33.5% Douglas fir). The shaded heatmap represents the kernel density estimate of point concentrations (darker blue regions correspond to higher density).

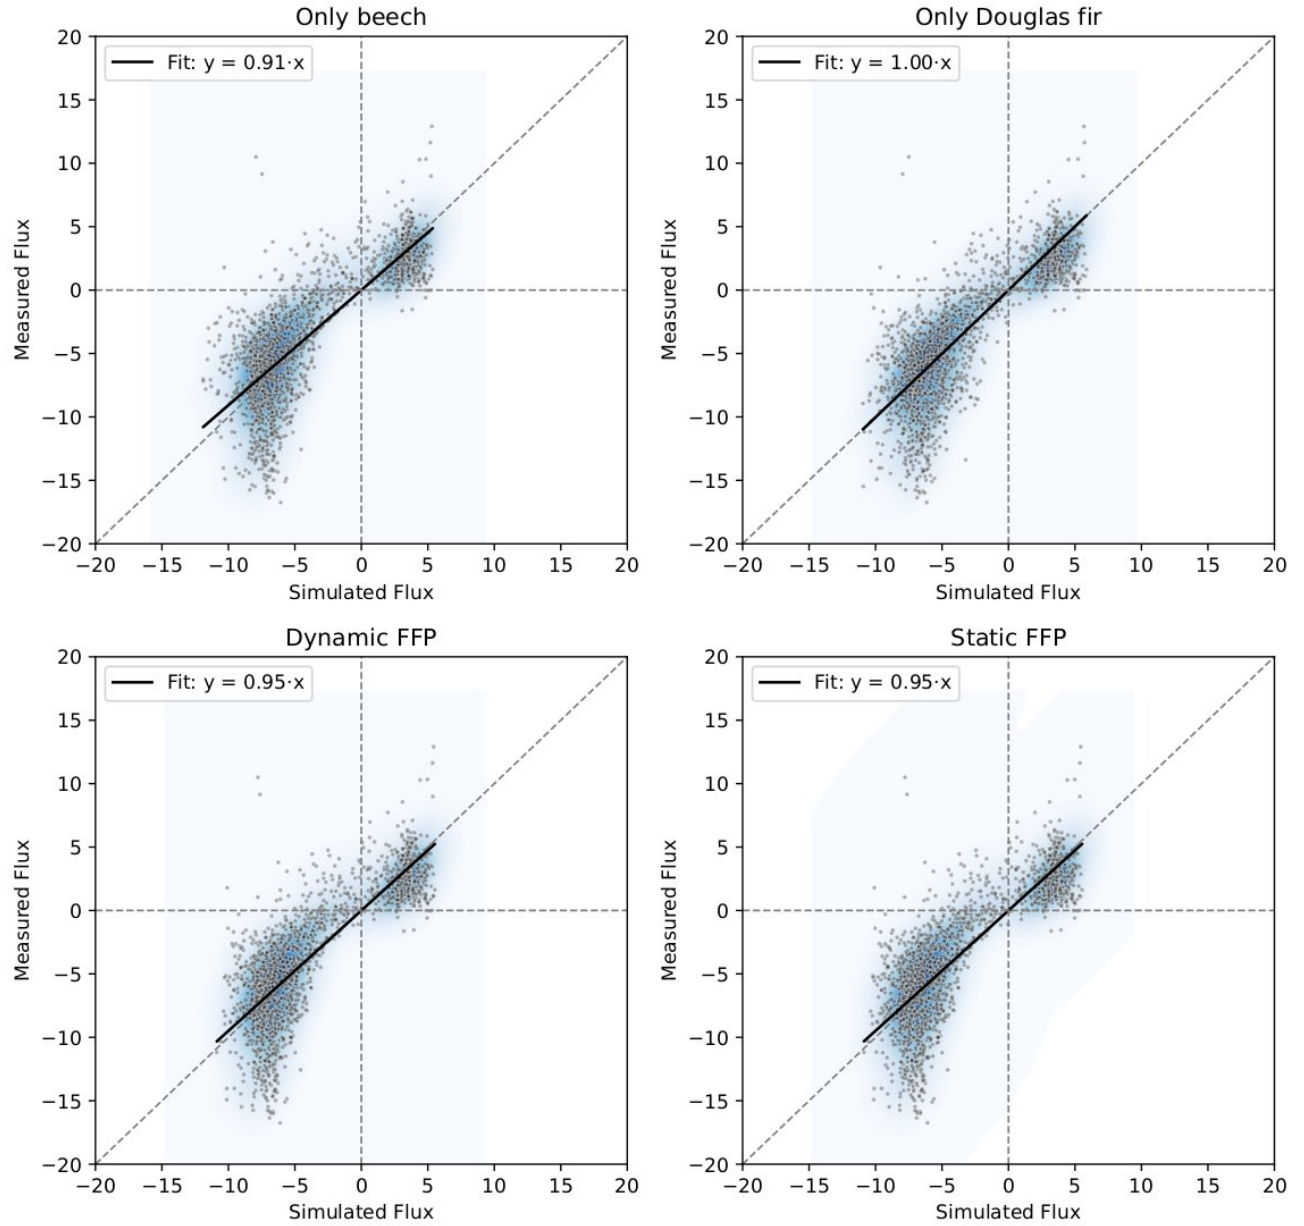

Fig. S5: Comparison between hourly measured and simulated net ecosystem exchange (NEE,  $\text{kgC ha}^{-1}\text{hr}^{-1}$ ) during the peak growing season (May to September) at the ECOSENSE forest. (a) Simulated NEE for a pure beech stand compared to measured EC NEE. (b) Simulated NEE for a pure Douglas fir stand compared to measured EC NEE. (c) Weighted NEE based on a dynamic footprint composition, with hourly contributions from each species estimated using footprint–land cover overlay. (d) Weighted NEE based on a static footprint composition (66.5% beech, 33.5% Douglas fir). The shaded heatmap represents the kernel density estimate of point concentrations (darker blue regions correspond to higher density).

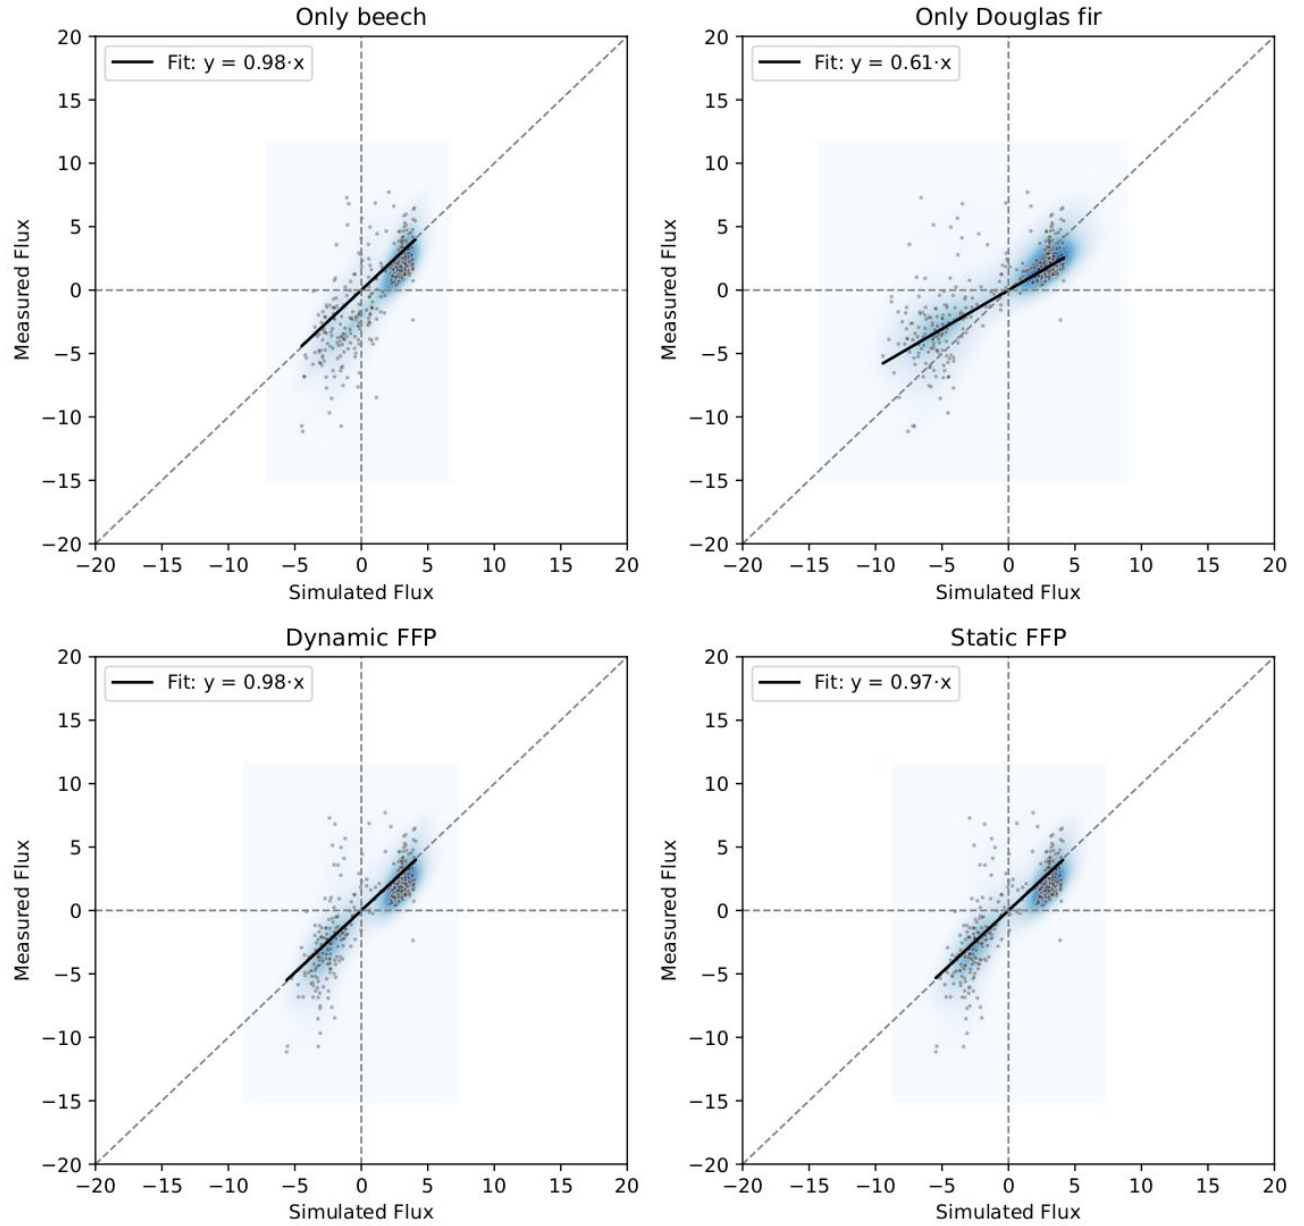

Fig. S6: Comparison between hourly measured and simulated net ecosystem exchange (NEE,  $\text{kgC ha}^{-1}\text{hr}^{-1}$ ) during the senescence (October) at the ECOSENSE forest. (a) Simulated NEE for a pure beech stand compared to measured EC NEE. (b) Simulated NEE for a pure Douglas fir stand compared to measured EC NEE. (c) Weighted NEE based on a dynamic footprint composition, with hourly contributions from each species estimated using footprint–land cover overlay. (d) Weighted NEE based on a static footprint composition (66.5% beech, 33.5% Douglas fir). The shaded heatmap represents the kernel density estimate of point concentrations (darker blue regions correspond to higher density).



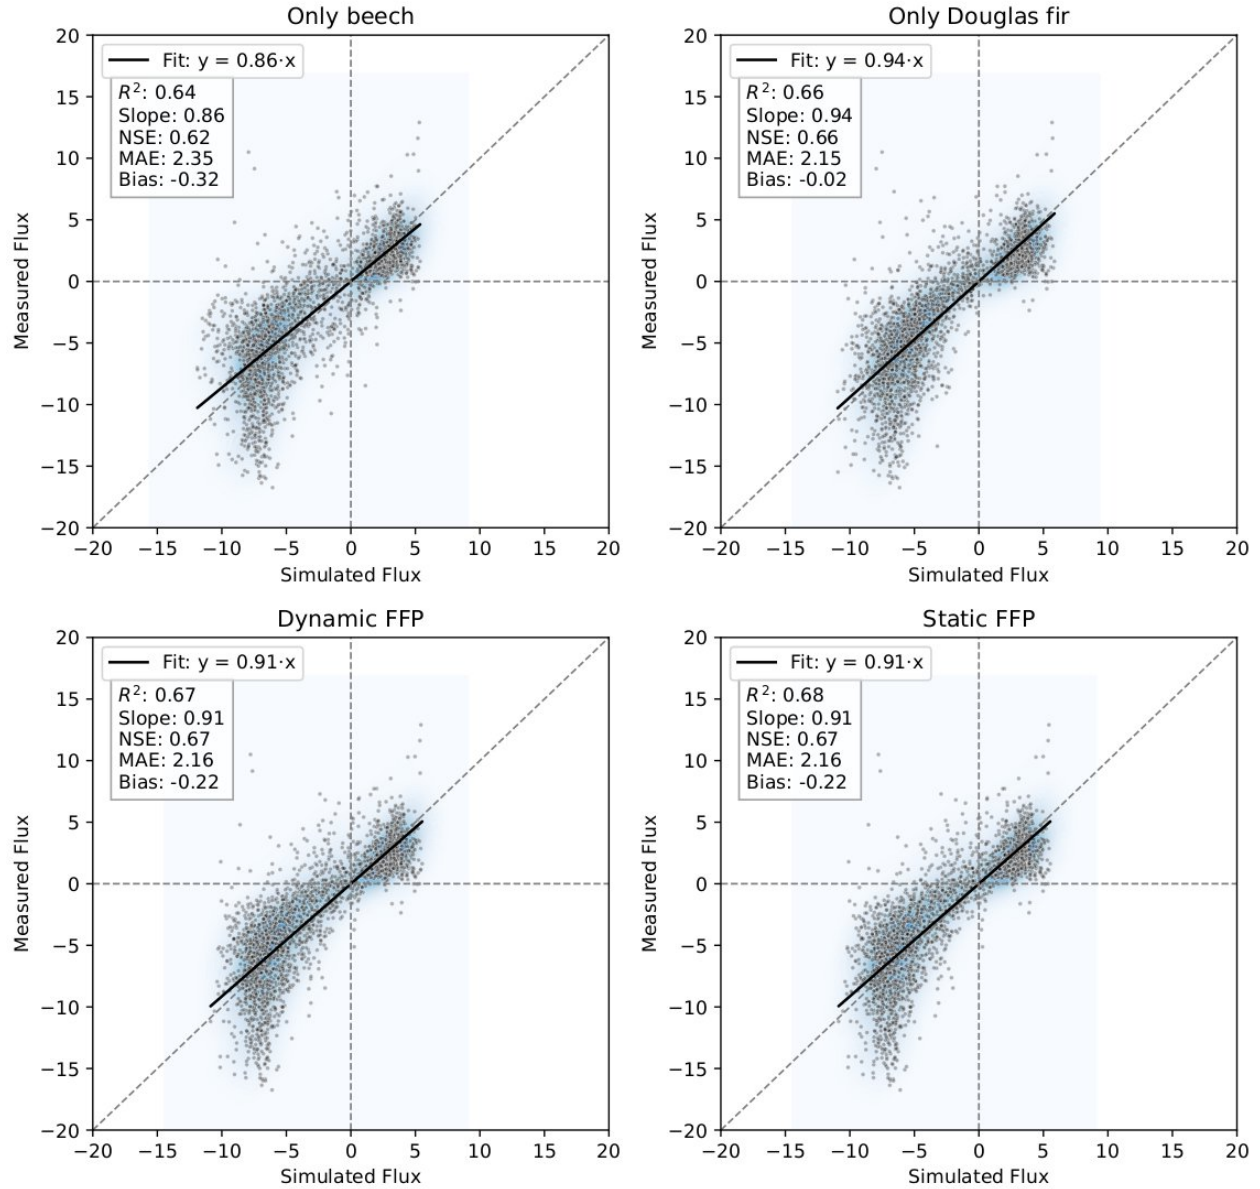

Fig. S7: Comparison between hourly measured and simulated net ecosystem exchange (NEE,  $\text{kgC ha}^{-1}\text{hr}^{-1}$ ) during the growing season (April to October) at the ECOSENSE forest. (a) Simulated NEE for a pure beech stand compared to measured EC NEE. (b) Simulated NEE for a pure Douglas fir stand compared to measured EC NEE. (c) Weighted NEE based on a dynamic footprint composition, with hourly contributions from each species estimated using footprint–land cover overlay. (d) Weighted NEE based on a static footprint composition (66.5% beech, 33.5% Douglas fir). The shaded heatmap represents the kernel density estimate of point concentrations (darker blue regions correspond to higher density)

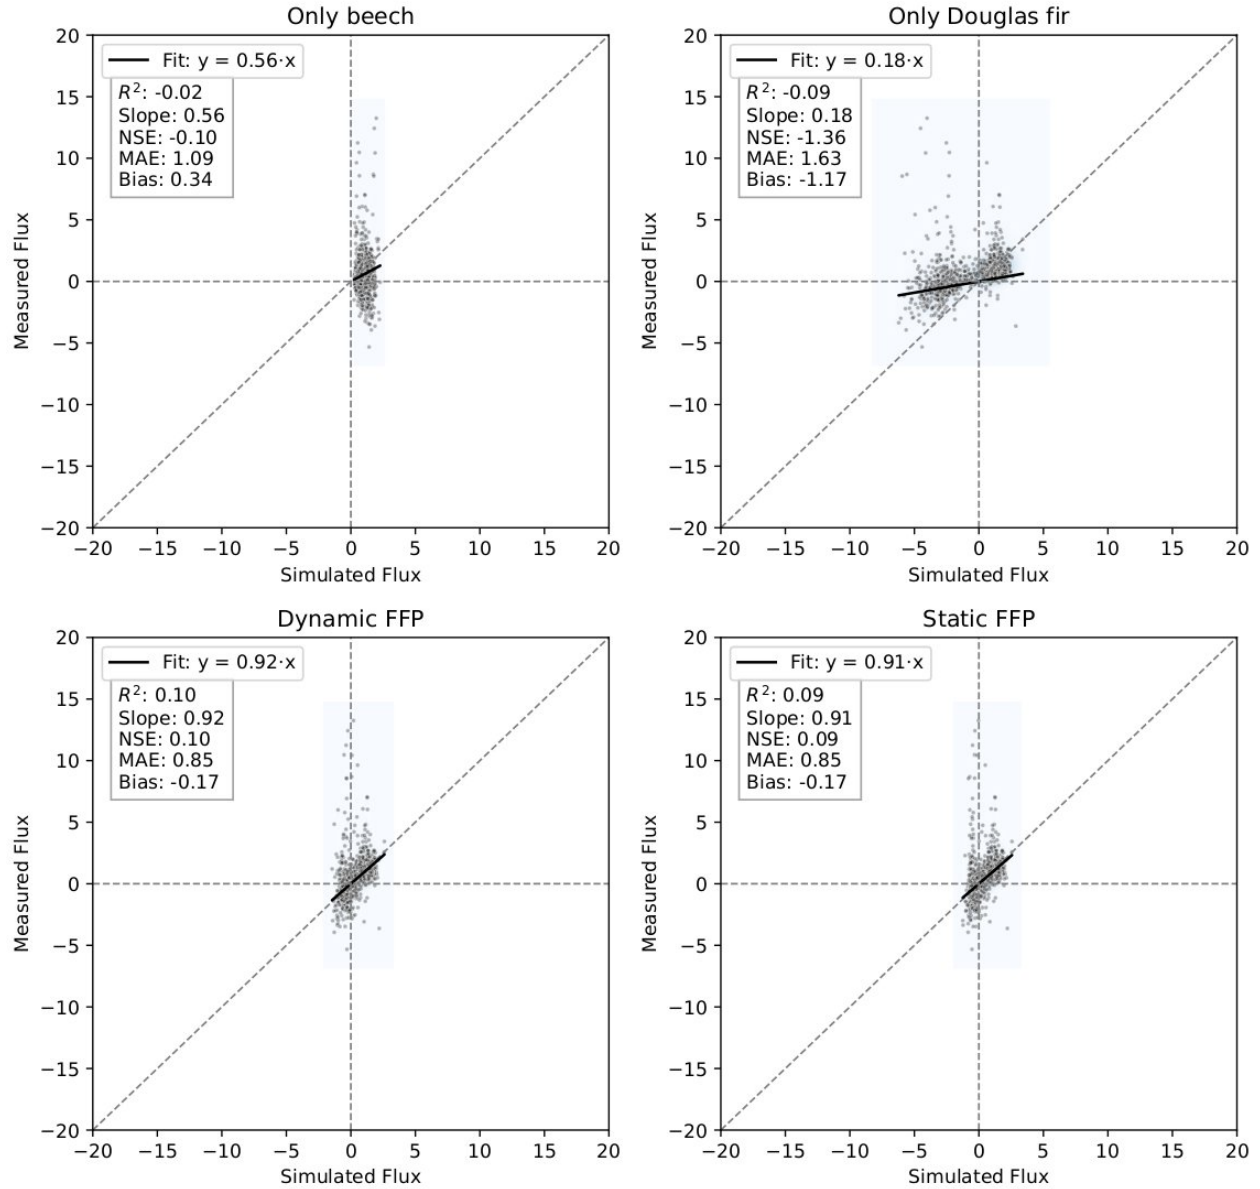

Fig. S8: Comparison between hourly measured and simulated net ecosystem exchange (NEE,  $\text{kgC ha}^{-1}\text{hr}^{-1}$ ) during the growing season (November to March) at the ECOSENSE forest. (a) Simulated NEE for a pure beech stand compared to measured EC NEE. (b) Simulated NEE for a pure Douglas fir stand compared to measured EC NEE. (c) Weighted NEE based on a dynamic footprint composition, with hourly contributions from each species estimated using footprint–land cover overlay. (d) Weighted NEE based on a static footprint composition (66.5% beech, 33.5% Douglas fir). The shaded heatmap represents the kernel density estimate of point concentrations (darker blue regions correspond to higher density)



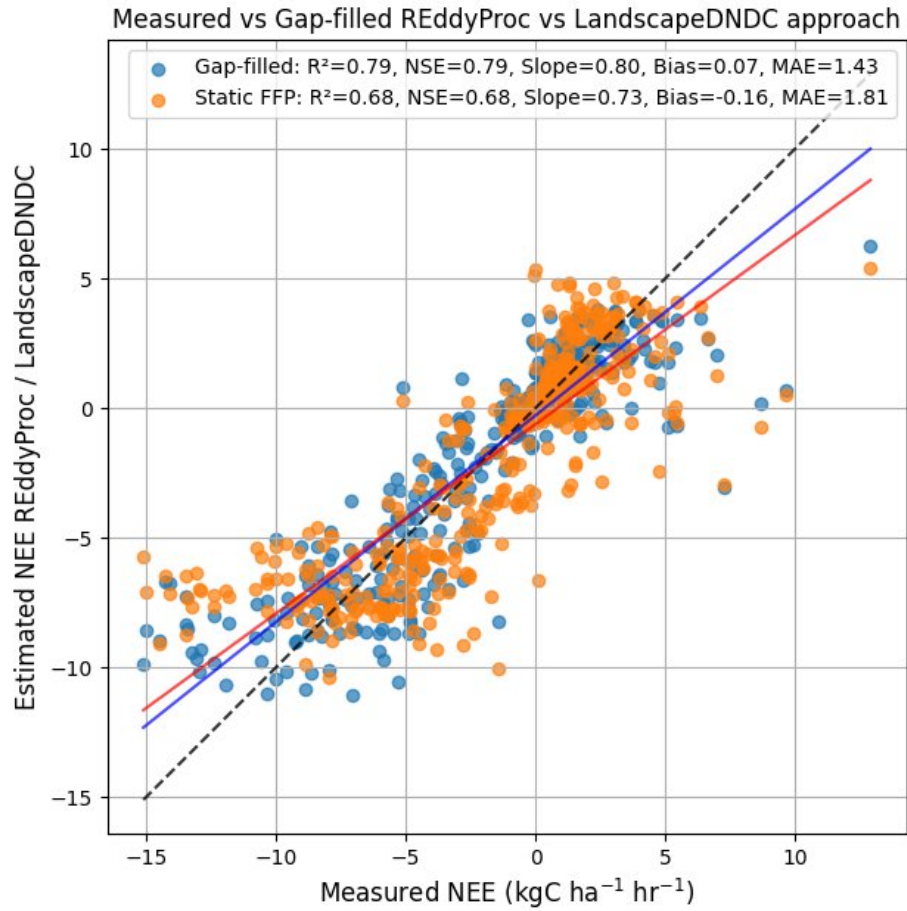

Fig. S9: Comparison between hourly measured and gap filled net ecosystem exchange (NEE,  $\text{kgC ha}^{-1} \text{ hr}^{-1}$ ) using the REdDyProc and the process based LandscapeDNDC approach. We randomly created 627 artificial gaps in the measured data and filled them with the two approaches.

Table S1: Parameters affecting the simulation of carbon and water exchange by LandscapeDNDC model.

| Variable              | Description                                                                                | Beech  | Douglas fir | References (Beech; Douglas fir)                                                    |
|-----------------------|--------------------------------------------------------------------------------------------|--------|-------------|------------------------------------------------------------------------------------|
| <b>Photosynthesis</b> |                                                                                            |        |             |                                                                                    |
| AEKC                  | Activation energy for Michaelis-Menten constant for CO <sub>2</sub> (J mol <sup>-1</sup> ) | 65000  | 65000       | Wang et al. (2003);<br>Falge et al. (1997) (assumed similar to Norway spruce)      |
| AEKO                  | Activation energy for Michaelis-Menten constant for O <sub>2</sub> (J mol <sup>-1</sup> )  | 36000  | 36000       | Wang et al. (2003);<br>Falge et al. (1997) (assumed similar to Norway spruce)      |
| AERD                  | Activation energy for dark respiration (J mol <sup>-1</sup> )                              | 36500  | 63500       | Dreyer et al. (2001);<br>Falge et al. (1997) (assumed similar to Norway spruce)    |
| AEVC                  | Activation energy for photosynthesis (J mol <sup>-1</sup> )                                | 70627  | 75750       | Kattge and Knorr (2007);<br>Falge et al. (1997) (assumed similar to Norway spruce) |
| AEVO                  | Activation energy for RubP oxygenation (J mol <sup>-1</sup> )                              | 37530  | 37530       | Long (1991) (all species)                                                          |
| AEJM                  | Activation energy for electron transport (J mol <sup>-1</sup> )                            | 48090  | 40000       | Medlyn et al. (2002);<br>Ibrom et al. (2006) (assumed similar to Norway spruce)    |
| KC25                  | Michaelis-Menten constant for CO <sub>2</sub>                                              | 299.5  | 260.0       | Wang et al. (2003);<br>Von Caemmerer et al. (1994)                                 |
| KO25                  | Michaelis-Menten constant for O <sub>2</sub>                                               | 159.6  | 179.0       | Wang et al. (2003);<br>Von Caemmerer et al. (1994)                                 |
| QVOVC                 | Relation between saturated rate of oxygenation and carboxylation                           | 0.21   | 0.21        | Long (1991) (all species)                                                          |
| QJVC                  | Relation between max. electron transport rate and RubP-saturated carboxylation             | 2.24   | 2.8         | Yan et al. (2023);<br>Manter et al. (2003)                                         |
| QRD25                 | Relation between dark respiration rate and carboxylation capacity                          | 0.0149 | 0.012       | Yan et al. (2023);<br>Warren and Adams (2006)                                      |
| SLOPE_GSA             | Slope of stomata response in the BERRY-BALL model                                          | 11.8   | 4.0         | Dufrene et al. (2005);<br>Van Wijk et al. (2000)                                   |
| THETA                 | Curvature parameter for photosynthesis                                                     | 0.882  | 0.9         | Yan et al. (2023);<br>Thornley (2002)                                              |
| VCMAX25               | Saturated rate of carboxylation at 25 °C (μmol m <sup>-2</sup> s <sup>-1</sup> )           | 40.0   | 52.5        | *;<br>**                                                                           |
| <b>Water exchange</b> |                                                                                            |        |             |                                                                                    |
| GSmax                 | Maximum stomata conductivity (mmol H <sub>2</sub> O m <sup>-2</sup> s <sup>-1</sup> )      | 81.5   | 50.0        | Medlyn and Jarvis (1999);<br>Schumann et al. (2024)                                |
| GSmin                 | Minimum stomata conductivity (mmol H <sub>2</sub> O m <sup>-2</sup> s <sup>-1</sup> )      | 4.3    | 2.0         | *;<br>**                                                                           |
| H2OREF_GS             | Relative available soil water content at which stomata closure starts                      | 0.35   | 0.4         | Granier et al. (2007);<br>Granier et al. (2000)                                    |
| WUECmax               | Maximum water use efficiency (mg H <sub>2</sub> O g C <sup>-1</sup> )                      | 10.0   | 9.0         | *;<br>**                                                                           |
| WUECmin               | Minimum water use efficiency (mg H <sub>2</sub> O g C <sup>-1</sup> )                      | 7.0    | 6.0         | *;<br>**                                                                           |
| <b>Phenology</b>      |                                                                                            |        |             |                                                                                    |
| DLEAFSHED             | Total leaf longevity from emergence (days)                                                 | 326    | 3180        | *;<br>**                                                                           |
| GDDFOL-START          | Temperature sum for foliage activity onset (°C)                                            | 346.9  | 155         | *;<br>**                                                                           |
| MFOLpot               | Foliage biomass for mature stands                                                          | 0.25   | 1.2         | *;                                                                                 |

|               |                                                                     |        |       |                                                  |
|---------------|---------------------------------------------------------------------|--------|-------|--------------------------------------------------|
|               | under closed canopy condition (kg m <sup>-2</sup> )                 |        |       | **                                               |
| NDFLUSH       | Time interval necessary to complete flushing of foliage (days)      | 21     | 90    | *, **                                            |
| NDMORT        | Time interval necessary to complete litterfall (days)               | 108    | 2815  | *, **                                            |
| SLAmax        | Specific leaf area in the shade (m <sup>2</sup> kg <sup>-1</sup> )  | 31.0   | 7.5   | Aranda et al. (2004); Bartelink (1996)           |
| SLAmin        | Specific leaf area in full light (m <sup>2</sup> kg <sup>-1</sup> ) | 11.0   | 3.5   | Aranda et al. (2004); Bartelink (1996)           |
| <b>Others</b> |                                                                     |        |       |                                                  |
| ALB           | Foliage albedo                                                      | 0.05   | 0.045 | Dufrene et al. (2005); Hember et al. (2010)      |
| EXT           | Light extinction factor                                             | 0.532  | 0.453 | Molina-Herrera et al. (2015); Raj et al. (2018)  |
| KM20 (km20)   | Maintenance coefficient at reference temperature                    | 0.9    | 0.32  | *, **                                            |
| NCFOLOpt      | Optimum nitrogen concentration of foliage (%)                       | 0.0254 | 0.015 | Mellert and Göttelein (2012); Thom et al. (2024) |

\*defined from joined automated parametrization of a German (Leinefelde, DE-Lnf), a Danish (Soroe, DK-Sor), and a Czech (Stitna, CZ-Stn) site

\*\*defined from joined automated parametrization of a site in Canada (Campbell River) and one from the Netherlands (Speulderbos)

## References (Table S1)

- Aranda, I., Pardo, F., Gil, L., and Pardos, J. A.: Anatomical basis of the change in leaf mass per area and nitrogen investment with relative irradiance within the canopy of eight temperate tree species, *Acta Oecologica*, 25, 187-195, 2004.
- Bartelink, H. H.: Allometric relationships on biomass and needle area of Douglas-fir, *Forest Ecol. Manage.*, 86, 193-203, 1996.
- Dreyer, E., Le Roux, X., Montpied, P., Daudet, F. A., and Masson, F.: Temperature response of leaf photosynthetic capacity in seedlings from seven temperate tree species, *Tree Physiol.*, 21, 223-232, <https://doi.org/10.1093/treephys/21.4.223>, 2001.
- Dufrene, E., Davi, H., Francois, C., Le Maire, G., Le Dantec, V., and Granier, A.: Modelling carbon and water cycles in a beech forest Part I: Model description and uncertainty analysis on modelled NEE, *Ecol. Modelling*, 185, 407-436, <https://doi.org/10.1016/j.ecolmodel.2005.01.004>, 2005.
- Falge, E., Ryel, R. J., Alsheimer, M., and Tenhunen, J. D.: Effects of stand structure and physiology on forest gas exchange: a simulation study for Norway spruce, *Trees-Struct. Funct.*, 11, 436-448, 1997.
- Granier, A., Loustau, D., and Bréda, N.: A generic model of forest canopy conductance dependent on climate, soil water availability and leaf area index, *Annales des Sciences Forestieres*, 57, 755-765, 2000.
- Granier, A., Reichstein, M., Bréda, N., Janssens, I. A., Falge, E., Ciais, P., Grünwald, T., Aubinet, M., Berbigier, P., Bernhofer, C., Buchmann, N., Facini, O., Grassi, G., Heinesch, B., Ilvesniemi, H., Keronen, P., Knohl, A., Köstner, B., Lagergren, F., Lindroth, A., Longdoz, B., Loustau, D., Mateus, J., Montagnani, L., Nys, C., Moors, E., Papale, D., Peiffer, M., Pilegaard, K., Pita, G., Pumpanen, J., Rambal, S., Rebmann, C., Rodrigues, A., Seufert, G., Tenhunen, J., Vesala, T., and Wang, Q.: Evidence for soil water control on carbon and water dynamics in European forests during the extremely dry year: 2003, *Agric. Forest Meteorol.*, 143, 123-145, 2007.

- Hember, R. A., Coops, N. C., Black, T. A., and Guy, R. D.: Simulating gross primary production across a chronosequence of coastal Douglas-fir forest stands with a production efficiency model, *Agric. Forest Meteorol.*, 150, 238-253, 2010.
- Ibrom, A., Jarvis, P. G., Clement, R., Morgenstern, K., Oltchev, A., Medlyn, B. E., Wang, Y. P., Wingate, L., Moncrieff, J. B., and Gravenhorst, G.: A comparative analysis of simulated and observed photosynthetic CO<sub>2</sub> uptake in two coniferous forest canopies, *Tree Physiol.*, 26, 845-864, 2006.
- Kattge, J., and Knorr, W.: Temperature acclimation in a biochemical model of photosynthesis: a reanalysis of data from 36 species, *Plant Cell Environ.*, 30, 1176-1190, <https://doi.org/10.1111/j.1365-3040.2007.01690.x>, 2007.
- Long, S. P.: Modification of the response of photosynthetic productivity to rising temperature by atmospheric CO<sub>2</sub> concentrations: Has its importance been underestimated?, *Plant Cell Environ.*, 14, 729-739, <https://doi.org/10.1111/j.1365-3040.1991.tb01439.x>, 1991.
- Manter, D. K., Bond, B. J., Kavanagh, K. L., Stone, J. K., and Filp, G. M.: Modelling the impacts of the foliar pathogen, *Phaeocryptopus gaeumannii*, on Douglas-fir physiology: net canopy carbon assimilation, needle abscission and growth, *Ecol. Modelling*, 164, 211-226, 2003.
- Medlyn, B. E., and Jarvis, P. G.: Design and use of a database of model parameters from elevated [CO<sub>2</sub>] experiments, *Ecol. Modelling*, 124, 69-83, 1999.
- Medlyn, B. E., Loustau, D., and Delzon, S.: Temperature response of parameters of a biochemically based model of photosynthesis. I. Seasonal changes in mature maritime pine (*Pinus pinaster* Ait.), *Plant Cell Environ.*, 25, 1155-1165, 2002.
- Mellert, K., and Göttelein, A.: Comparison of new foliar nutrient thresholds derived from van den Burg's literature compilation with established central European references, *Eur. J. Forest Res.*, 131, 1461-1472, 2012.
- Molina-Herrera, S., Grote, R., Santabárbara-Ruiz, I., Kraus, D., Klatt, S., Haas, E., Kiese, R., and Butterbach-Bahl, K.: Simulation of CO<sub>2</sub> fluxes at European forest ecosystems with the coupled soil-vegetation process model "LandscapeDNDC", *Forests*, 6, 1779-1809, <https://doi.org/10.3390/f6061779>, 2015.
- Raj, R., Hamm, N. A. S., van der Tol, C., and Stein, A.: Bayesian integration of flux tower data into process-based simulator for quantifying uncertainty in simulated output, *Geosci. Model Dev.*, 11, 83-101, <https://doi.org/10.5194/gmd-11-83-2018>, 2018.
- Schumann, K., Schuldt, B., Fischer, M., Ammer, C., and Leuschner, C.: Xylem safety in relation to the stringency of plant water potential regulation of European beech, Norway spruce, and Douglas-fir trees during severe drought, *Trees*, 38, 607-623, <https://doi.org/10.1007/s00468-024-02499-5>, 2024.
- Thom, D., Rammer, W., Albrich, K., Brazianus, K. H., Dobor, L., Dollinger, C., Hansen, W. D., Harvey, B. J., Hlásny, T., Hoecker, T. J., Honkaniemi, J., Keeton, W. S., Kobayashi, Y., Kruszka, S. S., Mori, A., Morris, J. E., Peters-Collae, S., Ratajczak, Z., Simensen, T., Storms, I., Suzuki, K. F., Taylor, A. R., Turner, M. G., Willis, S., and Seidl, R.: Parameters of 150 temperate and boreal tree species and provenances for an individual-based forest landscape and disturbance model, *Data in Brief*, 55, 110662, <https://doi.org/10.1016/j.dib.2024.110662>, 2024.
- Thornley, J. H. M.: Instantaneous canopy photosynthesis: Analytical expressions for sun and shade leaves based on exponential light decay down the canopy and an acclimated non-rectangular hyperbola for leaf photosynthesis, *Ann. Bot.*, 89, 451-458, <https://doi.org/10.1093/aob/mcf071>, 2002.
- Van Wijk, M. T., Dekker, S. C., Bouten, W., Bosveld, F. C., Kohsiek, W., Kramer, K., and Mohren, G. M. J.: Modeling daily gas exchange of a Douglas-fir forest: comparison of three stomatal conductance models with and without a soil water stress function, *Tree Physiol.*, 20, 115-122, 2000.
- Von Caemmerer, S., Evans, J. R., Hudson, G. S., and Andrews, T. J.: The kinetics of ribulose-1,5-bisphosphate carboxylase/oxygenase in vivo inferred from measurements of photosynthesis in leaves of transgenic tobacco, *Planta*, 195, 88-97, <https://doi.org/10.1007/BF00206296>, 1994.
- Wang, Q., Tenhunen, J., Falge, E., Bernhofer, C., Granier, A., and Vesala, T.: Simulation and scaling of temporal variation in gross primary production for coniferous and deciduous temperate forests, *Glob. Change Biol.*, 10, 37-51, <https://doi.org/10.1111/j.1365-2486.2003.00716.x>, 2003.

- Warren, C. R., and Adams, M. A.: Internal conductance does not scale with photosynthetic capacity: implications for carbon isotope discrimination and the economics of water and nitrogen use in photosynthesis, *Plant Cell Environ.*, 29, 192-201, 2006.
- Yan, Y., Klosterhalfen, A., Moyano, F., Cuntz, M., Manning, A. C., and Knohl, A.: A modeling approach to investigate drivers, variability and uncertainties in  $O_2$  fluxes and  $O_2 : CO_2$  exchange ratios in a temperate forest, *Biogeosciences*, 20, 4087-4107, <https://doi.org/10.5194/bg-20-4087-2023>, 2023.
