# Supplementary material for: Matching scales of eddy covariance measurements and process-based modeling – Assessing spatiotemporal dynamics of carbon and water fluxes in a mixed forest in Southern Germany
Source: Copernicus journal article supplement (doi:10.5194/egusphere-2025-4605), 2025-10-06
Supplement: Supplementary file [file egusphere-2025-4605-AC2-supplement.pdf]

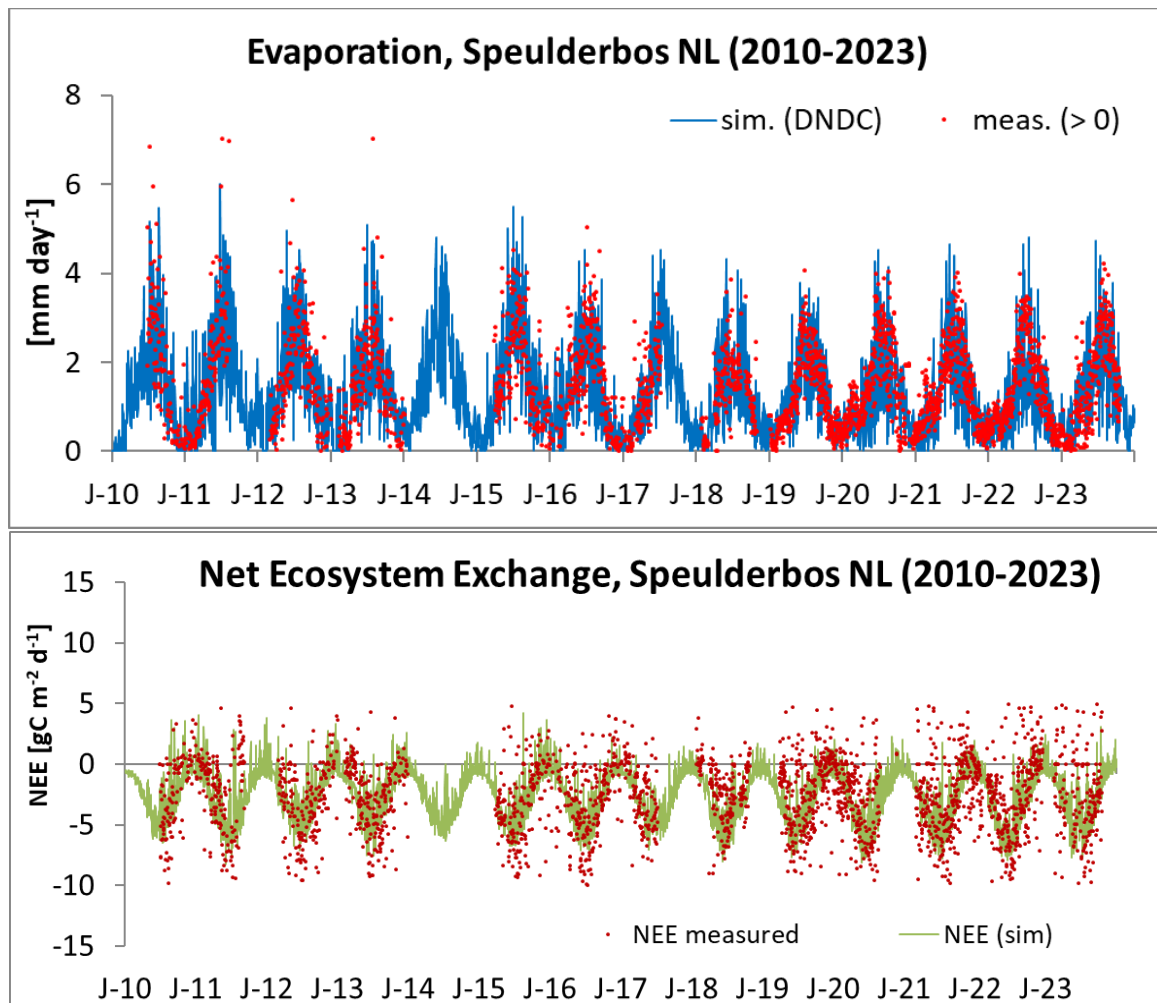

Figure T: Preliminary comparison of measured and simulated daily Evaporation (top) and NEE (bottom) throughout 11 consecutive years.

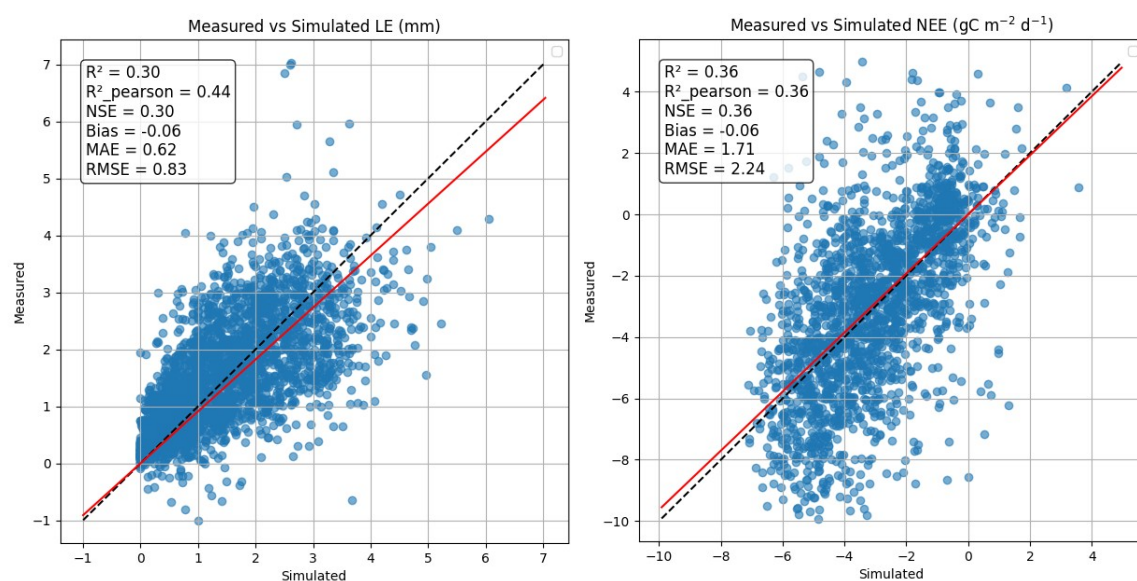

Figure U: Preliminary statistical relations between simulated and measured fluxes
