# Supplementary material for: Matching scales of eddy covariance measurements and process-based modeling – Assessing spatiotemporal dynamics of carbon and water fluxes in a mixed forest in Southern Germany
Source: Copernicus journal article supplement (doi:10.5194/egusphere-2025-4605), 2025-10-06
Supplement: Supplementary file [file egusphere-2025-4605-AC3-supplement.pdf]

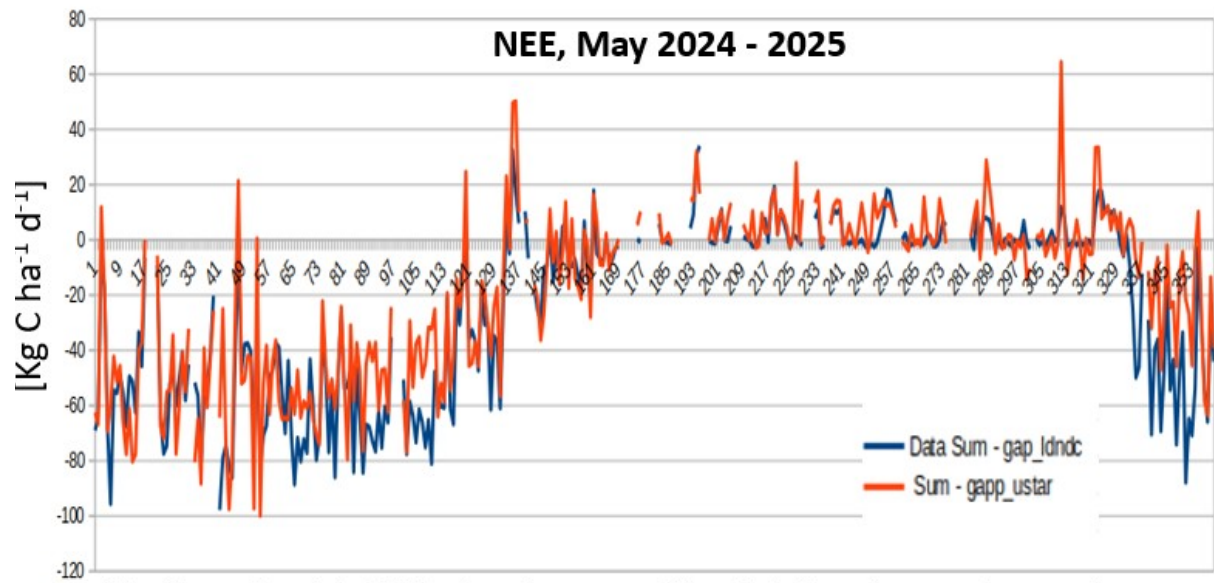

Fig. S...: simulated (blue) and measured (red) daily net ecosystem exchange (NEE) of carbon dioxide (*graphics and letter size will be improved*).
